# Supplementary material for: Acanthamoeba Mannose and Laminin Binding Proteins Variation across Species and Genotypes
Source: MDPI journal article supplement (doi:10.3390/microorganisms10112162), 2022-10-31
Supplement: s1 [file s1]

**Table S1.** List of *Acanthamoeba* binding proteins accession numbers.

| GT  | species                  | strain   | WSG project | accession nos. <sup>1</sup>                                                                                              |                                                                                                |
|-----|--------------------------|----------|-------------|--------------------------------------------------------------------------------------------------------------------------|------------------------------------------------------------------------------------------------|
|     |                          |          |             | Mannose Binding Protein MBP1                                                                                             | Laminin Binding Protein LBP <sup>2</sup>                                                       |
| T4A | <i>A. quina</i>          | Vil3     | CDFN01      | CDFN01055557:12308-15411                                                                                                 | CDFN01057992:c1259-176                                                                         |
| T4A | <i>Acanthamoeba</i> sp.  | undet.   | CDFL01      | CDFL01207565:c524-614;<br>CDFL01208350: 4453-7482;<br>CDFL01217467:c1332-1451;<br>CDFL01205628.1:c1016-417               | CDFL01212578:c1122-33                                                                          |
| T4A | <i>Acanthamoeba</i> sp.  | undet.   | CDFJ01      | CDFJ01222928:4349-7350;<br>CDFJ01191546:498-600                                                                          | CDFJ01208995:c1122-33                                                                          |
| T4A | <i>Acanthamoeba</i> sp.  | undet.   | CDFK01      | CDFK01178816:c479-500;<br>CDFK01196080:c1082-1;<br>CDFK01219318:c3000-1; CDFK01110294<br>1-177; CDFK01213929: c5869-5267 | CDFK01218873:2507-3597                                                                         |
| T4A | <i>A. lugdunensis</i>    | L3a      | CDFB01      | CDFB01056783:c835-1; CDFB01056784:1-<br>1277; CDFB01057839:1-1823;<br>CDFB01049883:c3360-2409                            | CDFB01065890:5579-6663                                                                         |
| T4A | <i>Acanthamoeba</i> sp.  | C3       | JAJGAO01    | JAJGAO010000003:c190347-187196                                                                                           | JAJGAO010000024:c303058-301977                                                                 |
| T4A | <i>Acanthamoeba</i> sp.  | Linc-AP1 | LQHA01      | LQHA01002101:1564-4682                                                                                                   | LQHA01000768:c5284-4200                                                                        |
| T4D | <i>A. rhyodes</i>        | Singh    | CDFC01      | CDFC01051249:c1326-1;<br>CDFC01060751:c456-1;<br>CDFC01043110:c2212-776                                                  | CDFC01062378:c2707-1642                                                                        |
| T4D | <i>A. mauritaniensis</i> | 1652     | CDFE01      | CDFE01049898:2257-5474                                                                                                   | CDFE01024373:c98-1;<br>CDFE01012671:c127-1;<br>CDFE01020295:c127-1;<br>CDFE01049673:c2767-1854 |
| T4G | <i>A. terricola</i>      | Neff     | JAJGAP01    | JAJGAP010000003:1659702-1662860                                                                                          | JAJGAP010000022:c306652-305571                                                                 |
| T4G | <i>A. terricola</i>      | Neff     | AEYA01      | AEYA01002376:202059-205217                                                                                               | AEYA01001381:c3313-2232                                                                        |
| T4G | <i>A. terricola</i>      | Neff     | AHJI01      | no result <sup>3</sup>                                                                                                   | NW_004457598:c175024-176105<br>ACA1_385450 (putative LBP, pseudo)                              |
| T4F | <i>A. triangularis</i>   | SH621    | CDFD01      | CDFD01052511:2071-3639;<br>CDFD01027228:c2092-1;<br>CDFD01027227:1-1209                                                  | CDFD01037165:18655-19717                                                                       |
| T2  | <i>A. palestinensis</i>  | Reich    | CDFA01      | CDFA01025191:14111-17415                                                                                                 | CDFA01025720:86346-87388                                                                       |
| T10 | <i>A. culbertsoni</i>    | Lilly A1 | CDFF01      | CDFF01071382:16785-19304                                                                                                 | CDFF01068896:342-1441                                                                          |
| T22 | <i>Acanthamoeba</i> sp.  | undet.   | CDEZ01      | CDEZ01024055:2187-5626                                                                                                   | CDEZ01023550:c354-1;<br>CDEZ01018663:c8501-7358                                                |
| T5  | <i>A. lenticulata</i>    | PD2S     | CDFG01      | CDFG01072604:283-3420                                                                                                    | CDFG01076243:c20135-19169                                                                      |
| T5  | <i>A. lenticulata</i>    | 72/2     | MSTW01      | MSTW01007909:1630-3768;<br>MSTW01007910:3-1085                                                                           | MSTW01004628:c4634-3668                                                                        |
| T5  | <i>A. lenticulata</i>    | PT14     | NAVB01      | NAVB01001349:c3792-643                                                                                                   | NAVB01006311:c3066-2100                                                                        |
| T7  | <i>A. astronyxis</i>     | undet.   | CDFI01      | no result <sup>3</sup>                                                                                                   | CDFI01105374:10207-11277                                                                       |
| T7  | <i>A. astronyxis</i>     | R&H      | CDFH01      | no result <sup>3</sup>                                                                                                   | CDFH01091946:266-1336                                                                          |
| T18 | <i>A. byersi</i>         | Pb30/40  | MRZZ01      | no result <sup>3</sup>                                                                                                   | MRZZ01011069:c2240-1130                                                                        |

<sup>1</sup> The range indicates start/stop codons. Multiple entries indicate overlapping contigs giving the complete gene sequence.<sup>2</sup> Many genomes have multiple (two to four) identical LBP gene copies, not reported here for simplicity.<sup>3</sup> The analysis gave MBP2.
