# Supplementary material for: Acanthamoeba Mannose and Laminin Binding Proteins Variation across Species and Genotypes
Source: MDPI journal article supplement (doi:10.3390/microorganisms10112162), 2022-10-31

Figure S2. Multiple alignment of *Acanthamoeba* full-length mannose-binding proteins (MBP1). The DUF 4114 region, the CXCXC motifs, the transmembrane domain (TMD) and the NPLF motif are highlighted by colored rectangles on the consensus sequence. Note that some sequences present either additional motifs (*A. lenticulata* T5, *A. triangularis* T4F) or extended gaps (*A. culbertsoni* T10, *Acanthamoeba* sp. T22) which seem to be specific to each line.

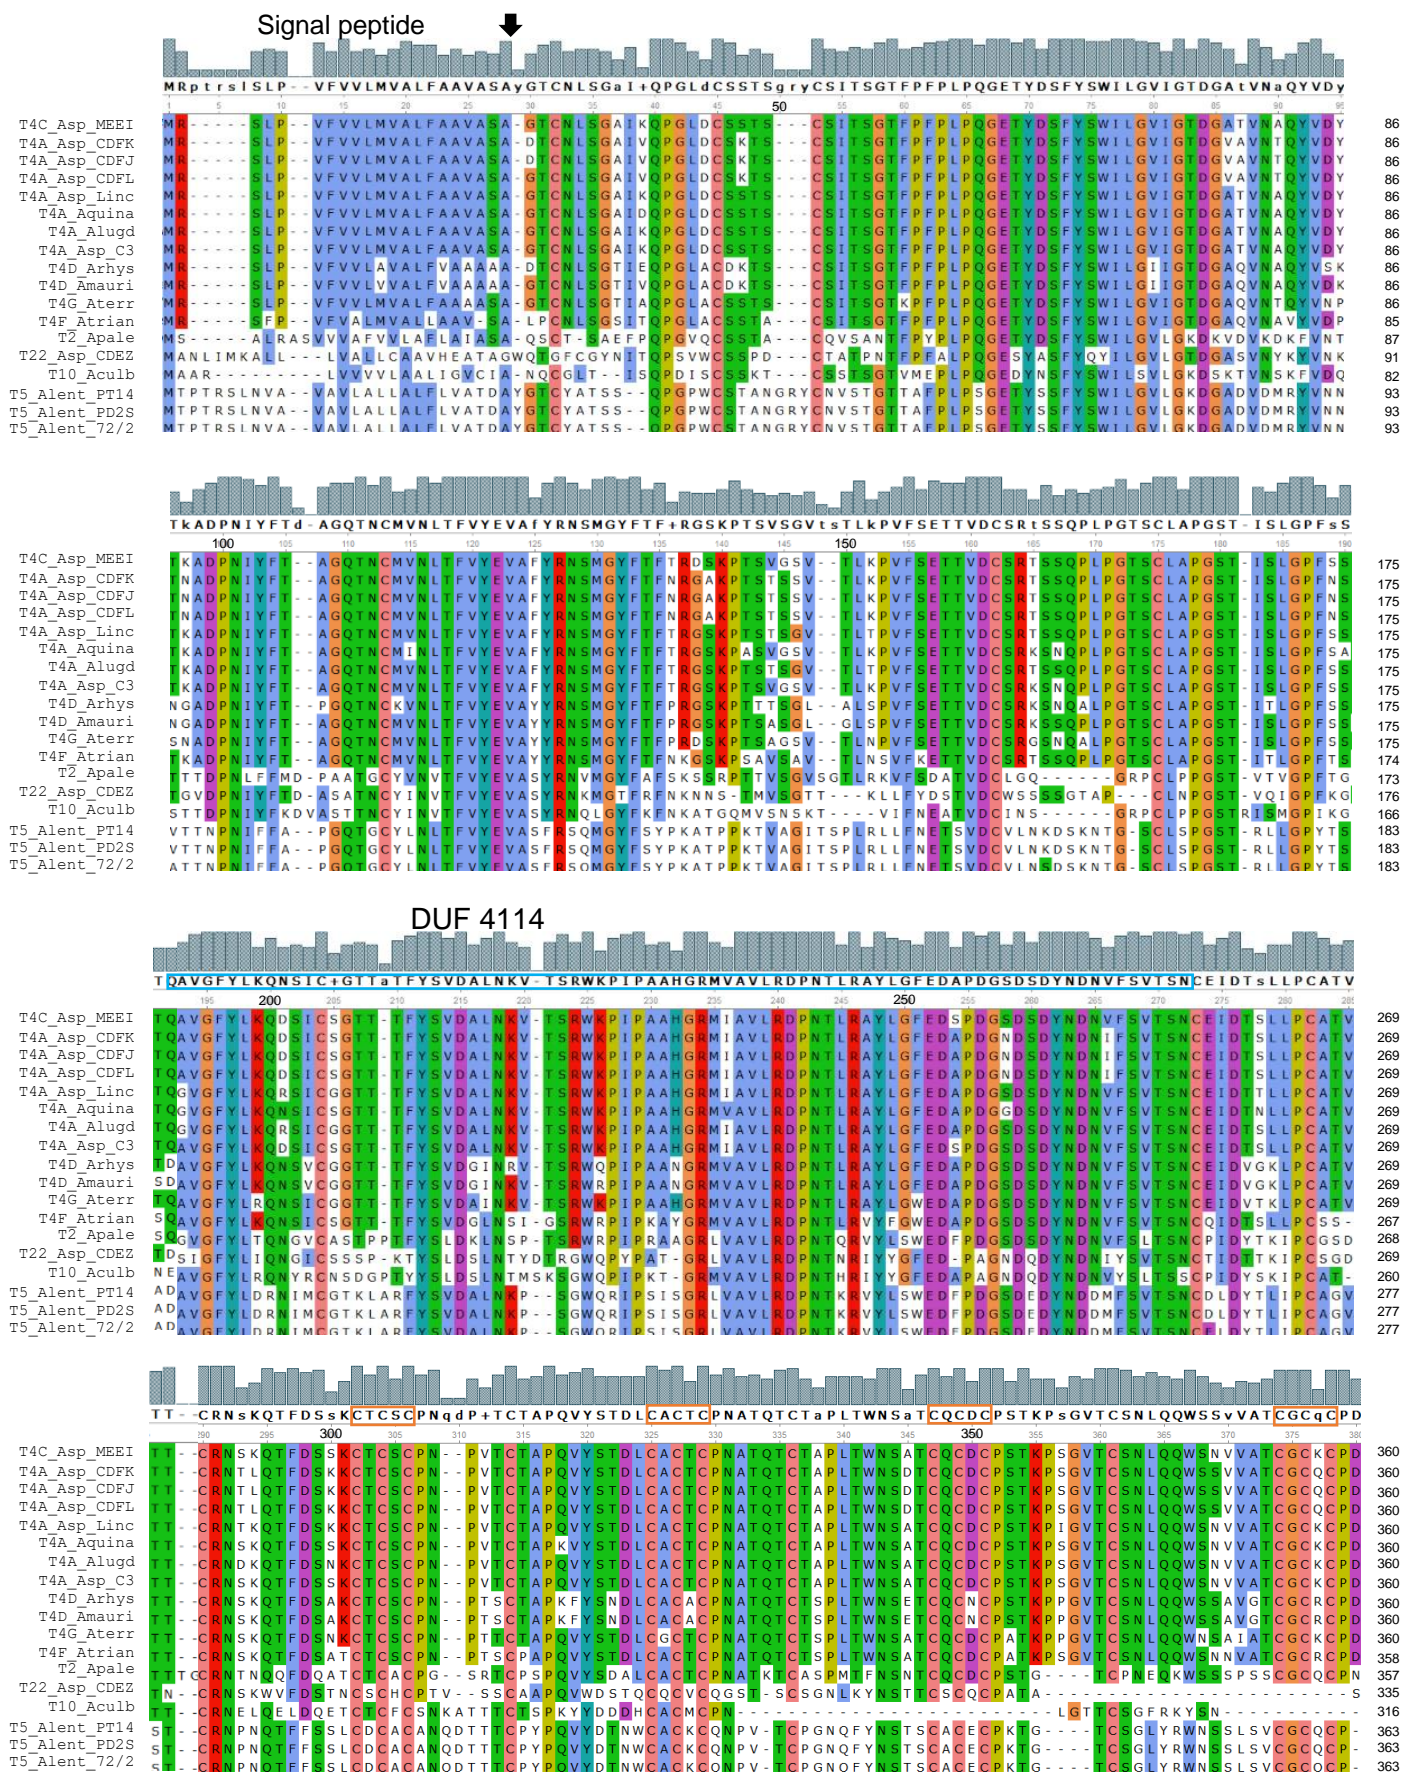

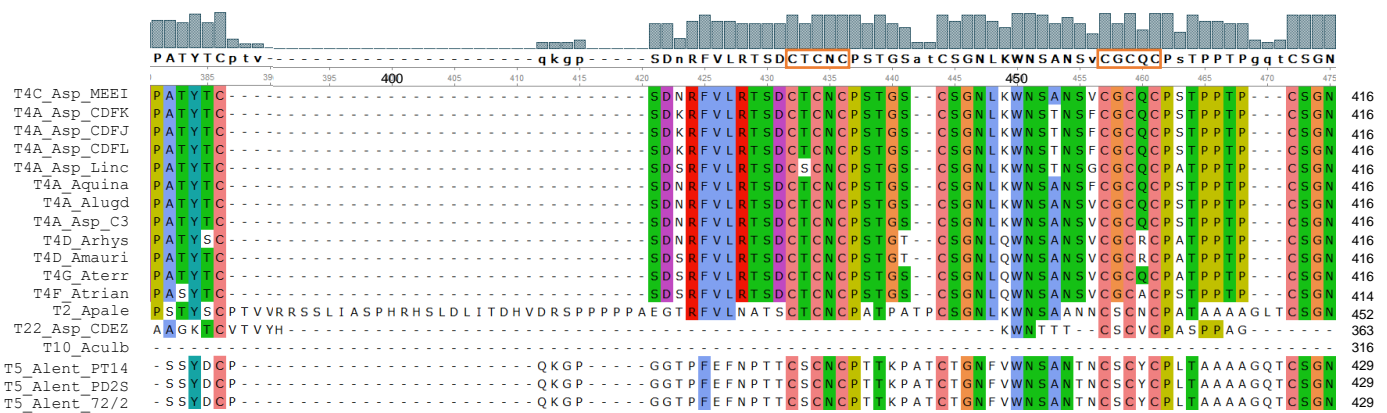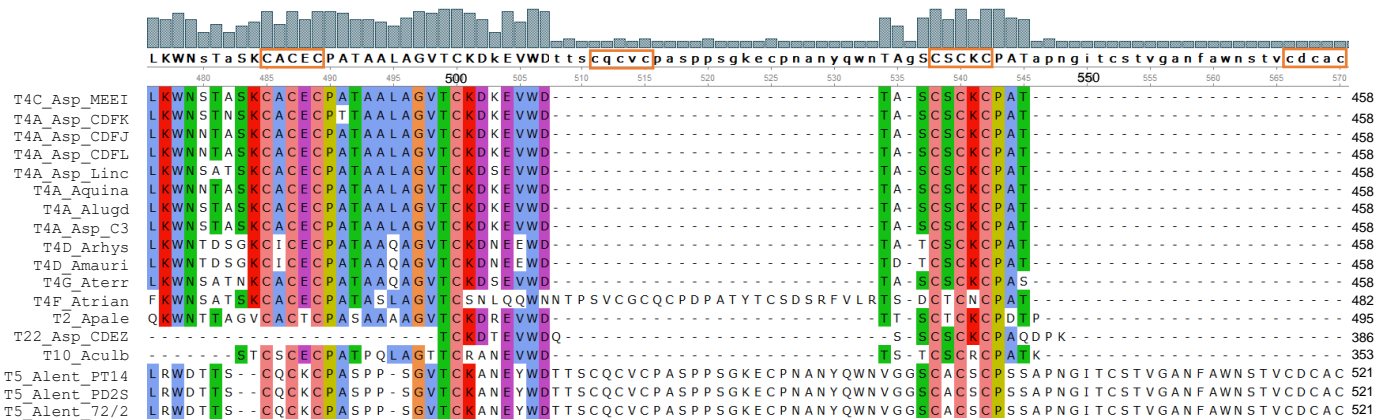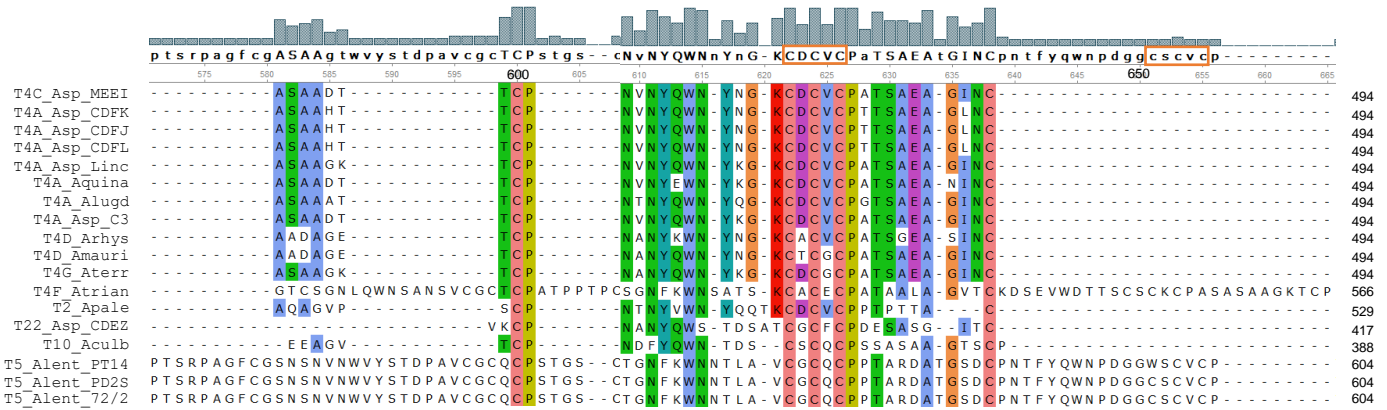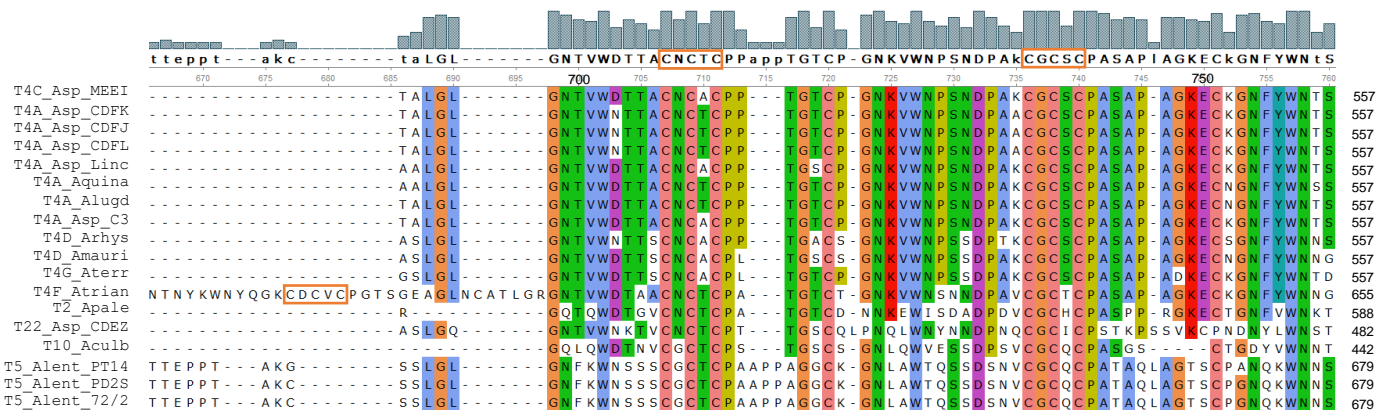



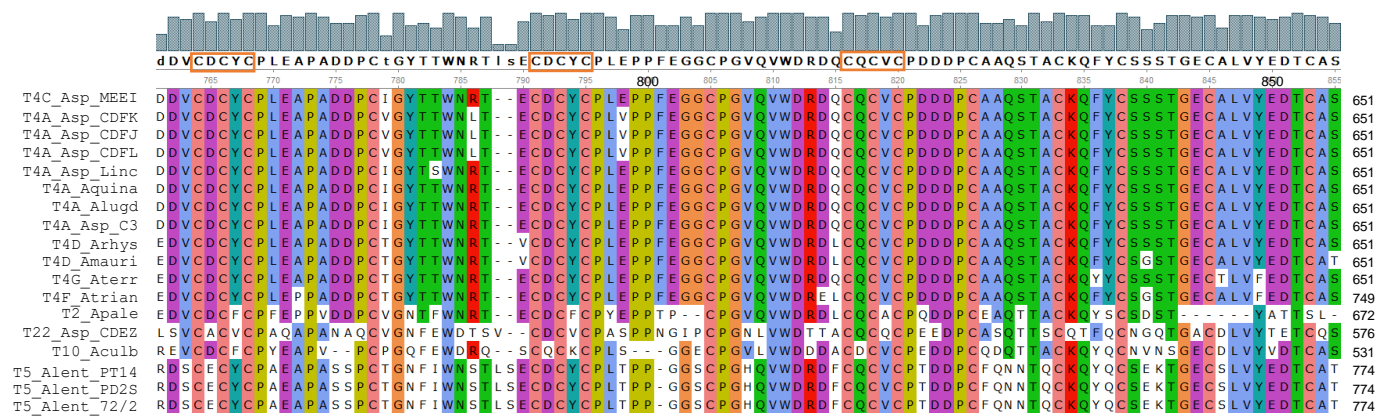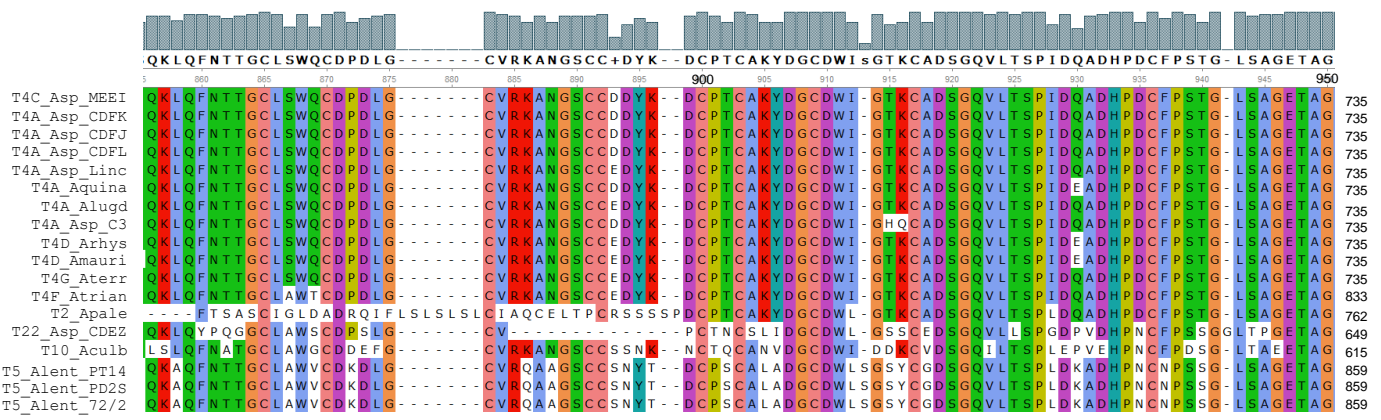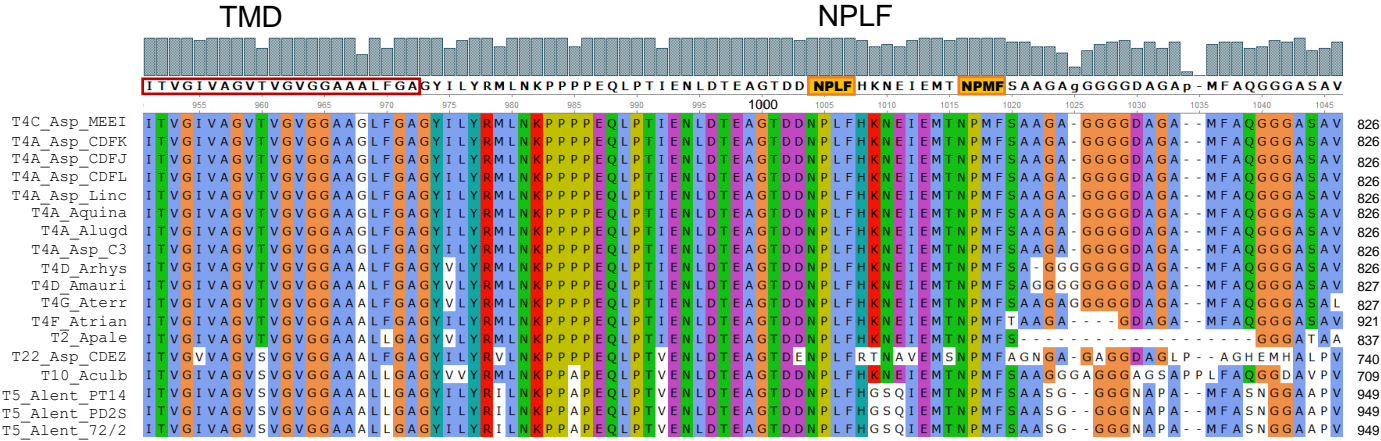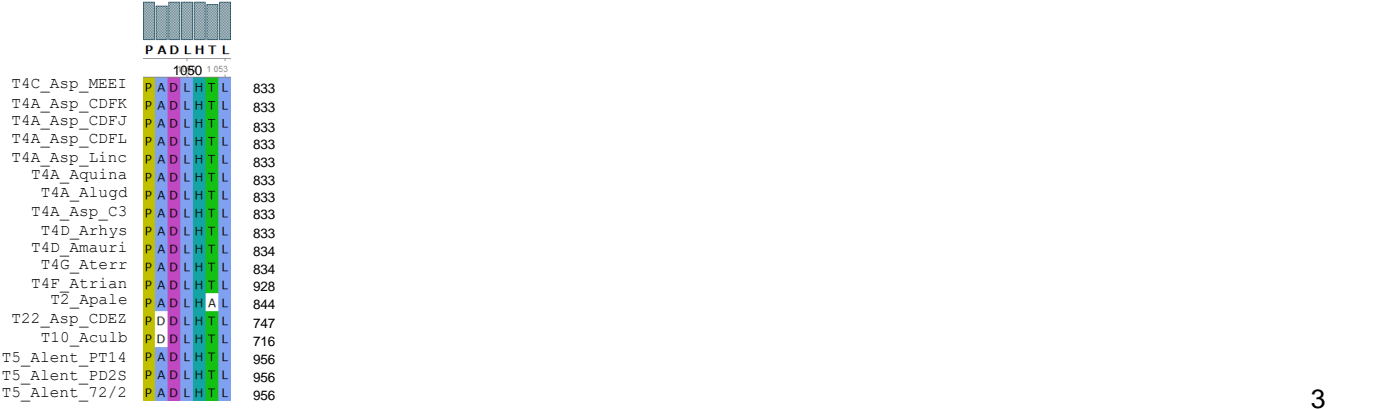

Supplement: s1 [file s1]
