# Supplementary material for: Acanthamoeba Mannose and Laminin Binding Proteins Variation across Species and Genotypes
Source: MDPI journal article supplement (doi:10.3390/microorganisms10112162), 2022-10-31
Supplement: s1 [file s1]

**Table S2.** Identity (top right, blue) and similarity (bottom left, green) values (%) for Laminin-Binding Proteins (LBP)

| GT | species                               | 1    | 2    | 3    | 4    | 5    | 6    | 7    | 8    | 9    | 10   | 11   | 12   | 13   | 14   | 15   | 16   | 17   | 18   |
|----|---------------------------------------|------|------|------|------|------|------|------|------|------|------|------|------|------|------|------|------|------|------|
| 1  | T4A <i>A. quina</i>                   |      | 98.9 | 98.9 | 99.2 | 91.4 | 98.9 | 98.9 | 98.5 | 98.9 | 98.5 | 91.7 | 82.0 | 87.2 | 87.5 | 82.3 | 61.0 | 60.5 | 61.5 |
| 2  | T4A <i>A. lugdunensis</i>             | 99.2 |      | 100  | 99.6 | 92.5 | 100  | 100  | 99.6 | 98.5 | 98.9 | 92.5 | 80.6 | 86.5 | 87.3 | 82.4 | 60.3 | 60.7 | 61.3 |
| 3  | T4A Asp Linc_AP1                      | 99.2 | 100  |      | 99.6 | 92.5 | 100  | 100  | 99.6 | 98.5 | 98.9 | 92.5 | 80.6 | 86.5 | 87.3 | 82.4 | 60.3 | 60.7 | 61.3 |
| 4  | T4A Asp C3                            | 99.6 | 99.6 | 99.6 |      | 92.1 | 99.6 | 99.6 | 99.2 | 98.1 | 98.5 | 92.1 | 80.6 | 86.8 | 87.2 | 82.4 | 60.7 | 60.3 | 61.3 |
| 5  | T4A Asp CDFK                          | 92.1 | 92.5 | 92.5 | 92.1 |      | 92.5 | 92.5 | 92.1 | 91.0 | 91.4 | 85.0 | 73.9 | 79.7 | 80.8 | 76.4 | 63.5 | 64.3 | 56.2 |
| 6  | T4A Asp CDFL                          | 99.2 | 100  | 100  | 99.6 | 92.5 |      | 100  | 99.6 | 98.5 | 98.9 | 92.5 | 80.6 | 86.5 | 87.3 | 82.4 | 60.3 | 60.7 | 61.3 |
| 7  | T4D <i>A. mauritaniensis</i>          | 99.2 | 100  | 100  | 99.6 | 92.5 | 100  |      | 99.6 | 98.5 | 98.9 | 92.5 | 80.6 | 86.5 | 87.3 | 82.4 | 60.3 | 60.7 | 61.3 |
| 8  | T4D <i>A. rhyodes</i>                 | 99.2 | 100  | 100  | 99.6 | 92.5 | 100  | 100  |      | 98.1 | 98.5 | 92.9 | 80.2 | 86.1 | 86.9 | 82.8 | 59.9 | 60.3 | 61.7 |
| 9  | T4F <i>A. triangularis</i>            | 98.9 | 99.2 | 99.2 | 98.9 | 92.1 | 99.2 | 99.2 | 99.2 |      | 99.2 | 92.1 | 81.6 | 86.8 | 87.5 | 82.7 | 60.7 | 61.0 | 61.5 |
| 10 | T4G <i>A. terricola</i>               | 98.9 | 98.9 | 98.9 | 98.5 | 92.0 | 98.9 | 98.9 | 98.9 | 99.6 |      | 92.1 | 81.6 | 86.4 | 87.5 | 83.0 | 60.5 | 60.9 | 61.0 |
| 11 | T2 <i>A. palestiniensis</i>           | 95.8 | 95.9 | 95.9 | 95.5 | 88.7 | 95.9 | 95.9 | 95.9 | 96.2 | 95.8 |      | 79.4 | 83.1 | 83.9 | 82.4 | 58.8 | 60.3 | 60.8 |
| 12 | T12 <i>A. healyi</i>                  | 86.8 | 85.3 | 85.3 | 85.3 | 82.9 | 85.3 | 85.3 | 85.3 | 86.4 | 86.4 | 86.0 |      | 90.1 | 80.1 | 76.0 | 60.5 | 60.9 | 58.8 |
| 13 | T10 <i>A. culbertsoni</i>             | 91.3 | 91.0 | 91.0 | 91.4 | 86.2 | 91.0 | 91.0 | 91.0 | 90.9 | 90.9 | 90.6 | 91.2 |      | 85.6 | 80.7 | 63.2 | 63.2 | 61.3 |
| 14 | T22 Asp CDEZ                          | 93.2 | 93.6 | 93.6 | 93.2 | 86.4 | 93.6 | 93.6 | 93.6 | 93.2 | 93.9 | 93.6 | 86.4 | 90.9 |      | 82.0 | 62.0 | 63.2 | 62.5 |
| 15 | T5 <i>A. lenticulata</i> <sup>a</sup> | 90.2 | 90.2 | 90.2 | 90.2 | 85.8 | 90.2 | 90.2 | 90.2 | 90.6 | 91.3 | 90.6 | 83.8 | 88.8 | 90.2 |      | 60.7 | 61.8 | 63.0 |
| 16 | T7 <i>A. astronyxis</i>               | 71.7 | 71.1 | 71.1 | 71.4 | 76.2 | 71.1 | 71.1 | 71.1 | 71.3 | 71.2 | 70.2 | 71.8 | 72.3 | 73.1 | 71.2 |      | 95.3 | 59.3 |
| 17 | T18 <i>A. byersi</i>                  | 70.9 | 71.4 | 71.4 | 71.1 | 75.8 | 71.4 | 71.4 | 71.4 | 71.7 | 71.6 | 71.3 | 72.2 | 73.1 | 74.2 | 71.5 | 97.4 |      | 58.5 |
| 18 | - <i>Balamuthia</i>                   | 75.8 | 75.6 | 75.6 | 75.6 | 69.7 | 75.6 | 75.6 | 75.6 | 75.8 | 75.4 | 75.8 | 73.5 | 77.3 | 78.4 | 75.4 | 68.9 | 69.3 |      |

<sup>a</sup> The three strains of *A. lenticulata* have identical sequences**Table S3.** Identity (top right, blue) and similarity (bottom left, green) values (%) for *Acanthamoeba* Mannose-Binding Proteins 1 (MBP1)

| GT | species                       | 1    | 2    | 3    | 4    | 5    | 6    | 7    | 8    | 9    | 10   | 11   | 12   | 13   | 14   | 15   | 16   | 17   | 18   |
|----|-------------------------------|------|------|------|------|------|------|------|------|------|------|------|------|------|------|------|------|------|------|
| 1  | T4C Asp MEEI_0184             |      | 95.7 | 95.8 | 95.9 | 96.6 | 97.1 | 97.8 | 99.3 | 87.5 | 88.2 | 91.7 | 78.7 | 59.3 | 50.4 | 51.8 | 51.8 | 51.6 | 51.8 |
| 2  | T4A Asp CDFK                  | 97.0 |      | 99.6 | 99.5 | 94.5 | 94.0 | 95.2 | 95.2 | 86.3 | 86.7 | 89.4 | 77.4 | 58.8 | 50.4 | 51.7 | 51.1 | 51.3 | 51.5 |
| 3  | T4A Asp CDFJ                  | 97.2 | 99.8 |      | 99.9 | 94.5 | 94.4 | 95.3 | 95.3 | 86.4 | 86.8 | 89.4 | 77.6 | 59.1 | 50.4 | 52.0 | 51.2 | 51.4 | 51.6 |
| 4  | T4A Asp CDFL                  | 97.4 | 99.6 | 99.9 |      | 94.6 | 94.5 | 95.4 | 95.4 | 86.3 | 86.9 | 89.6 | 77.6 | 59.1 | 50.7 | 52.0 | 51.3 | 51.5 | 51.7 |
| 5  | T4A Asp Linc_AP1              | 97.7 | 96.3 | 96.4 | 96.5 |      | 95.3 | 97.4 | 96.4 | 87.8 | 88.7 | 92.0 | 78.8 | 59.3 | 50.9 | 51.7 | 51.9 | 51.7 | 51.9 |
| 6  | T4A <i>A. quina</i>           | 98.6 | 96.4 | 96.6 | 96.8 | 97.2 |      | 96.4 | 97.4 | 87.6 | 88.0 | 90.5 | 78.1 | 59.1 | 50.8 | 52.2 | 51.0 | 51.1 | 51.3 |
| 7  | T4A <i>A. lugdunensis</i>     | 98.2 | 96.4 | 96.6 | 96.8 | 98.2 | 98.0 |      | 97.5 | 87.8 | 88.5 | 91.2 | 79.0 | 59.8 | 50.5 | 51.7 | 51.2 | 51.5 | 51.7 |
| 8  | T4A Asp C3                    | 99.5 | 96.8 | 97.0 | 97.1 | 97.7 | 98.8 | 98.2 |      | 87.5 | 88.0 | 91.6 | 78.3 | 58.9 | 50.3 | 51.8 | 51.8 | 51.6 | 51.8 |
| 9  | T4D <i>A. rhyodes</i>         | 92.4 | 91.5 | 91.5 | 91.4 | 93.0 | 92.3 | 92.4 | 92.4 |      | 96.2 | 89.2 | 75.6 | 58.7 | 49.8 | 51.5 | 52.1 | 52.2 | 52.4 |
| 10 | T4D <i>A. mauritaniensis</i>  | 92.8 | 91.7 | 91.7 | 91.8 | 93.2 | 92.4 | 92.7 | 92.8 | 97.7 |      | 90.4 | 76.4 | 58.3 | 50.7 | 52.1 | 51.7 | 51.9 | 52.1 |
| 11 | T4G <i>A. terricola</i>       | 95.4 | 93.6 | 93.8 | 93.9 | 95.3 | 94.5 | 94.6 | 95.3 | 93.8 | 94.7 |      | 77.9 | 59.3 | 49.8 | 52.0 | 52.4 | 52.6 | 52.8 |
| 12 | T4F <i>A. triangularis</i>    | 83.7 | 82.5 | 82.9 | 82.9 | 83.8 | 83.8 | 83.5 | 83.7 | 81.5 | 82.4 | 83.4 |      | 58.0 | 46.4 | 45.9 | 53.7 | 54.0 | 54.1 |
| 13 | T2 <i>A. palestiniensis</i>   | 73.6 | 72.9 | 73.0 | 73.0 | 73.1 | 73.5 | 73.6 | 73.6 | 72.5 | 71.3 | 72.6 | 68.3 |      | 46.1 | 46.6 | 47.2 | 47.2 | 47.1 |
| 14 | T22 Asp CDEZ                  | 64.3 | 63.3 | 63.3 | 63.6 | 63.5 | 63.4 | 63.5 | 63.9 | 62.7 | 63.2 | 63.3 | 58.0 | 60.0 |      | 53.5 | 41.9 | 42.0 | 42.1 |
| 15 | T10 <i>A. culbertsoni</i>     | 63.0 | 63.3 | 63.5 | 63.4 | 63.1 | 62.9 | 62.8 | 63.0 | 63.1 | 63.5 | 62.9 | 57.0 | 60.0 | 67.5 |      | 43.1 | 43.2 | 43.2 |
| 16 | T5 <i>A. lenticulata</i> T2/2 | 64.9 | 63.7 | 63.7 | 63.8 | 64.6 | 64.2 | 63.8 | 64.9 | 64.7 | 64.5 | 65.1 | 68.3 | 59.2 | 54.3 | 54.6 |      | 99.7 | 99.4 |
| 17 | T5 <i>A. lenticulata</i> PT14 | 64.4 | 63.7 | 63.7 | 63.8 | 64.1 | 64.3 | 64.0 | 64.3 | 64.9 | 64.5 | 64.3 | 68.6 | 58.9 | 54.6 | 54.7 | 99.7 |      | 99.7 |
| 18 | T5 <i>A. lenticulata</i> CDFG | 63.8 | 63.8 | 63.8 | 63.9 | 64.2 | 64.4 | 64.1 | 64.4 | 65.0 | 65.3 | 64.5 | 68.8 | 58.8 | 54.7 | 54.8 | 99.5 | 99.8 |      |
